# Supplementary material
Source: publisher figshare collection journal article supplement (https://acs.figshare.com/ndownloader/files/5171023)
Supplement: Supplementary file 1 [file 5171023]

**Supporting information**

**Micro and Nanofabrication of Robust Reactive Arrays Based on Covalent Coupling of Dendrimers to  
Activated Monolayers**

*Geerten H. Degenhart, Barbara Dordi, Holger Schönherr,\* and G. Julius Vancso\**

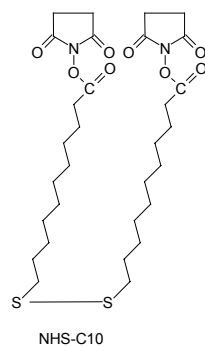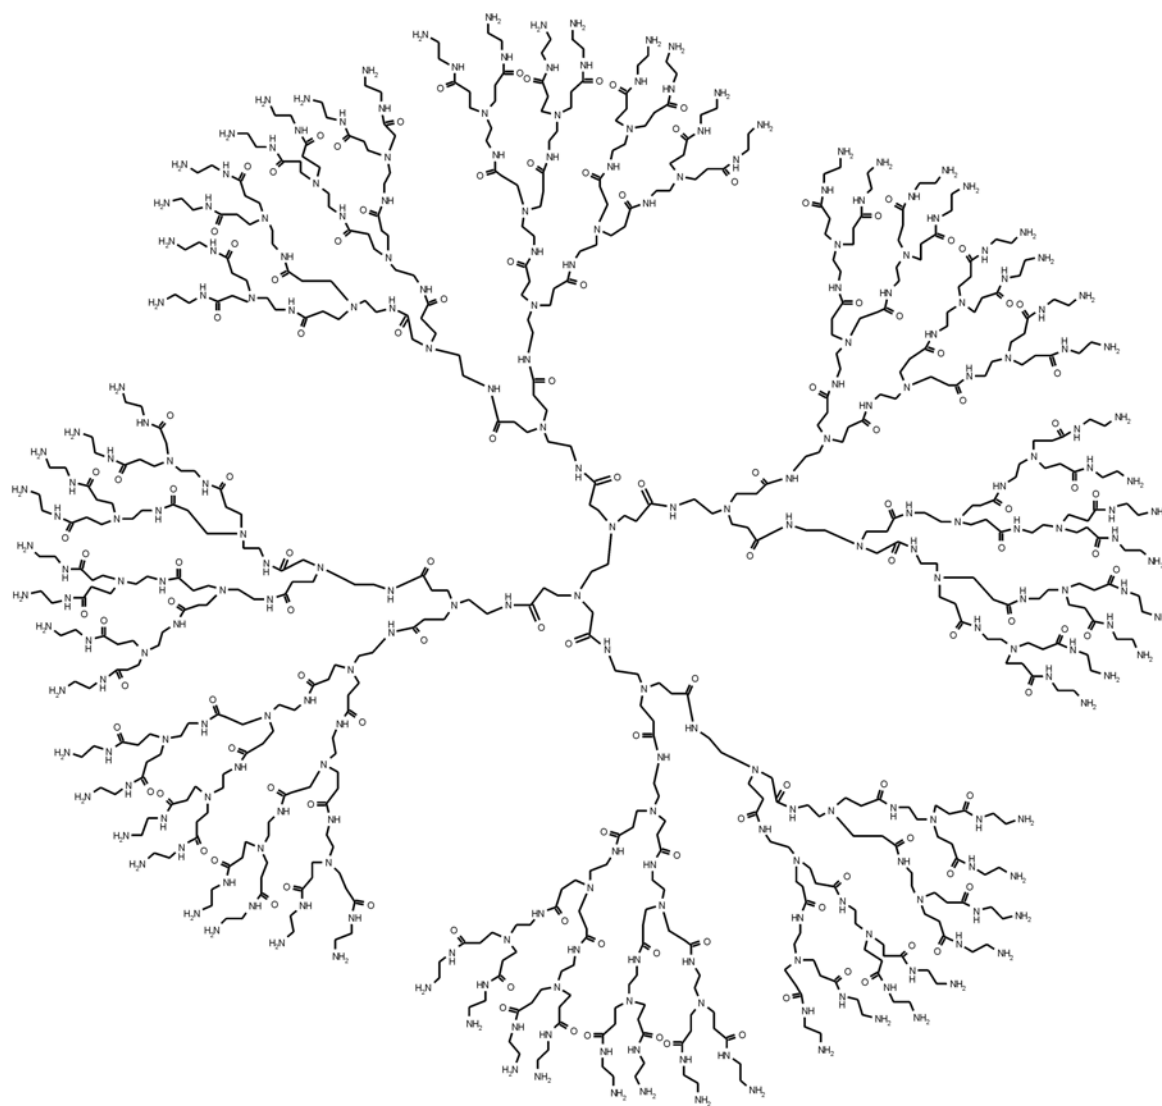

G<sub>4</sub> PAMAM

Scheme S1: Top: structure of adsorbate (NHS-C<sub>10</sub>); bottom: structure of G<sub>4</sub> PAMAM dendrimer.

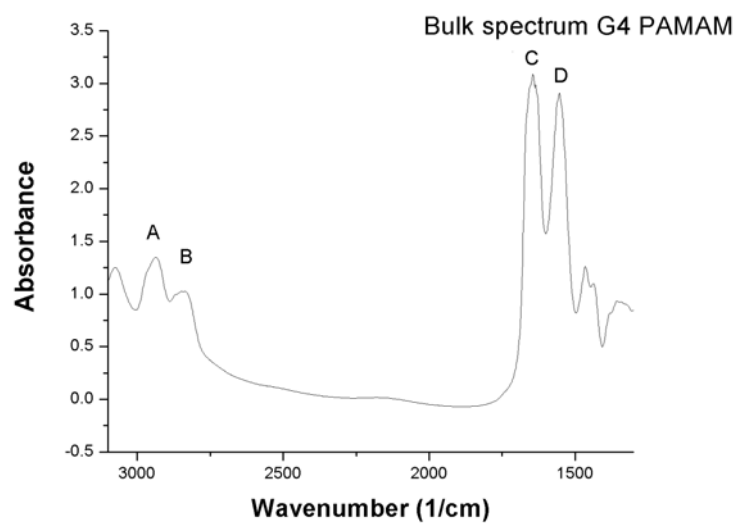

Figure S1: Transmission FTIR spectrum of G<sub>4</sub> PAMAM (bulk sample).

## Supporting information

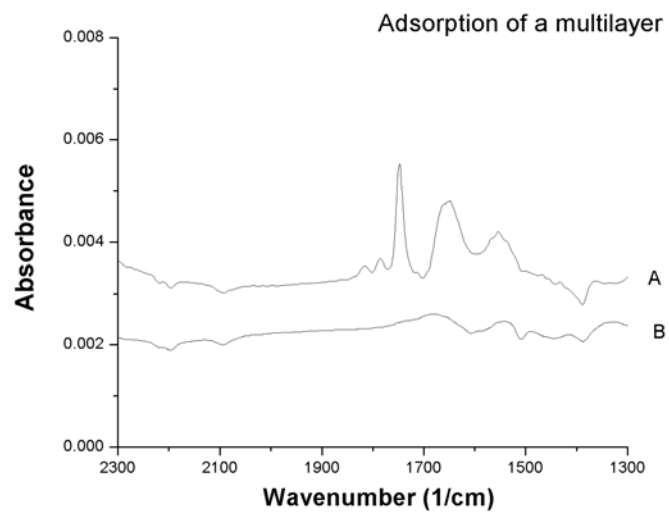

Figure S2: FTIR spectra of a dendrimer multilayer (A), and the same substrate after overnight storage in an airtight case, followed by thorough rinsing (B).

### Supporting information

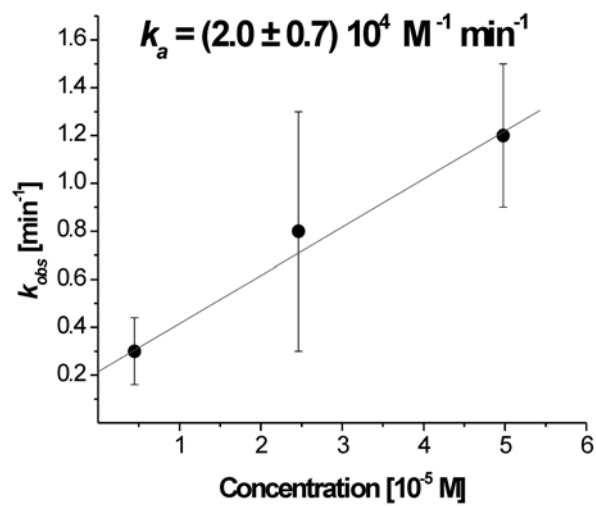

Figure S3. Concentration dependence of  $k_{obs}$  for PAMAM  $G_4$ . The best fitted line through the data has a slope of  $k_a$  and an intercept of  $k_d$ . Owing to the relatively larger errors of the data, the intercept and hence also  $k_d$  remain undefined.

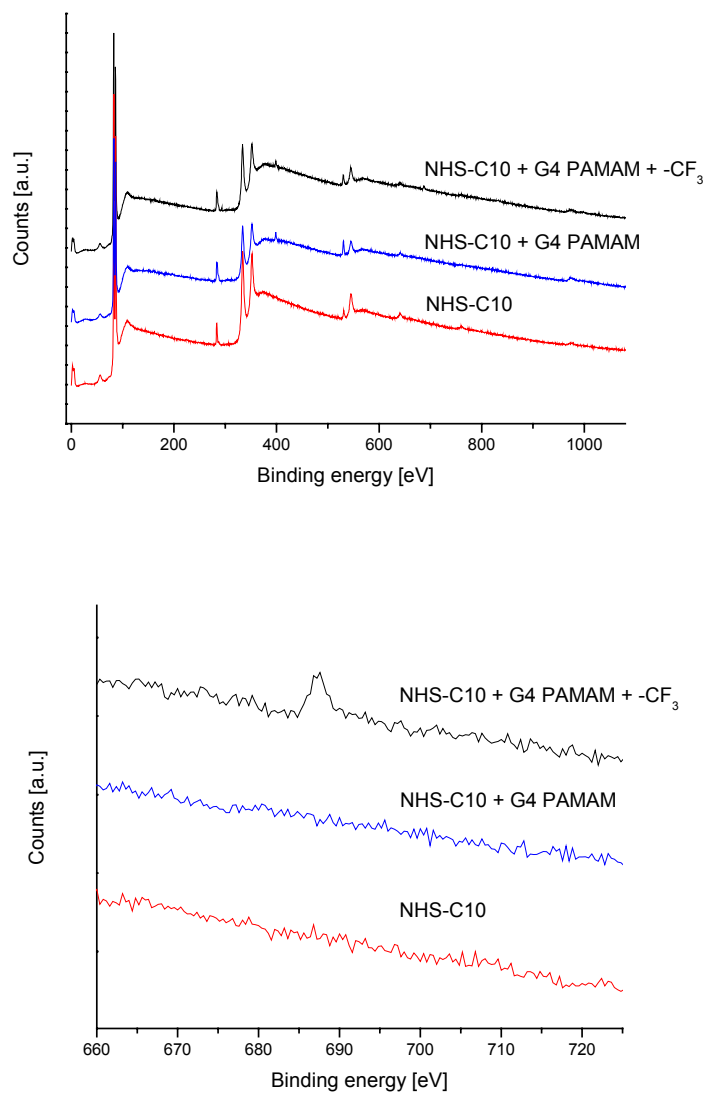

Figure S4: Top: XPS survey scans of NHS-C<sub>10</sub> SAM, NHS-C<sub>10</sub> SAM functionalized with a  $5.5 \times 10^{-5}$  M solution of G<sub>4</sub> PAMAM, and NHS-C<sub>10</sub> SAM functionalized with G<sub>4</sub> PAMAM following the reaction with TFAA; bottom: Enlarged sections of the XPS scans showing the F(1s) signals.

### Supporting information

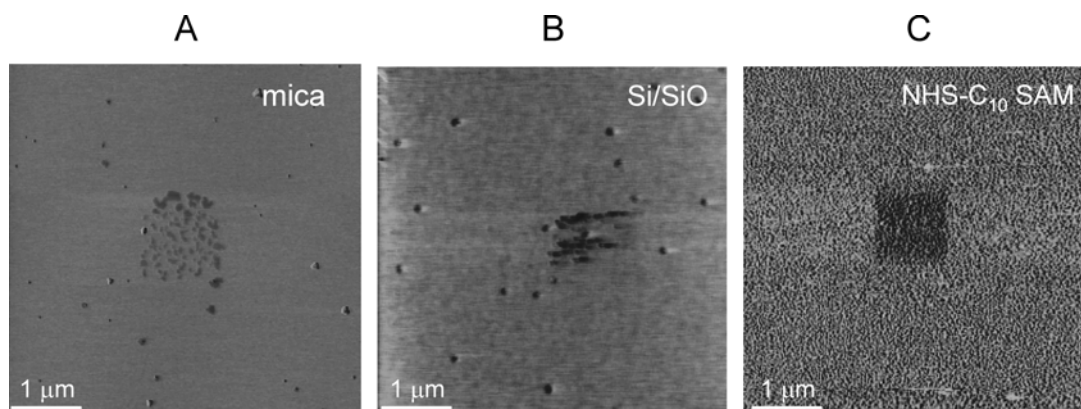

Figure S5. LFM images of a  $1 \times 1 \mu\text{m}^2$  square of PAMAM G<sub>4</sub> on three different substrates produced by DPN (acquired in air; scan size  $5 \times 5 \mu\text{m}^2$ ; friction forces [a.u.] increase from dark to bright contrast).
